# How sample heterogeneity can obscure the signal of microbial interactions

Running title: Heterogeneity obscures microbial interactions

**David W. Armitage\***

Department of Biological Sciences  
University of Notre Dame  
Notre Dame, IN 46556

**Stuart E. Jones**

Department of Biological Sciences  
University of Notre Dame  
Notre Dame, IN 46556

March 6, 2019

## ABSTRACT

1 Microbial community data are commonly subjected to computational tools such as correlation  
2 networks, null models, and dynamic models, with the goal of identifying the ecological processes  
3 structuring microbial communities. Researchers applying these methods assume that the signs and  
4 magnitudes of species interactions and vital rates can be reliably parsed from observational data on  
5 species' (relative) abundances. However, we contend that this assumption is violated when sample  
6 units contain any underlying spatial structure. Here, we show how three phenomena — Simpson's  
7 paradox, context-dependence, and nonlinear averaging — can lead to erroneous conclusions about  
8 population parameters and species interactions when samples contain heterogeneous mixtures of  
9 populations or communities. At the root of this issue is the fundamental mismatch between the  
10 spatial scales of species interactions (micrometres) and those of typical microbial community samples  
11 (millimetres to centimetres). These issues can be overcome by measuring and accounting for spatial  
12 heterogeneity at very small scales, which will lead to more reliable inference of the ecological  
13 mechanisms structuring natural microbial communities.

## 14 **1 Common “pattern-to-process” inferential methods yield erroneous results**

15 Advances in sequencing technology offer microbiologists unprecedented access to the composition and dynamics  
16 of microbial communities [1]. Marker gene and metagenomic surveys regularly chronicle hundreds to thousands of  
17 taxa, many previously unknown, all seemingly co-occurring within their respective habitats. In possession of these  
18 large observational datasets, microbial ecologists have adapted theory and methods developed from plant and animal  
19 ecology to investigate how species interactions — such as competition, predation, and facilitation — structure microbial  
20 communities [2, 3].

---

\*Corresponding author: [dave.armitage@gmail.com](mailto:dave.armitage@gmail.com)

21 Without experimental systems in which competition (or any other interaction) may be directly manipulated and  
22 detected, researchers often employ randomization-based null models, correlation networks, and population dynamic  
23 models to identify and quantify putative interspecific interactions from observational sequence data [4, 5, 6, 7]. Here,  
24 negative covariation between the abundances or relative abundance of taxa are commonly assumed to result from  
25 negative interspecific interactions such as competition. However, the utility of these methods for reliably parsing and  
26 quantifying signals of competition from alternative community assembly processes such as habitat filtering and trophic  
27 interactions has been disputed for decades [8].

28 Recently, a number of studies have challenged null model and correlation-based methods to recapitulate known  
29 interactions in well-studied marine intertidal habitats [9, 10, 11]. In all cases, these tests revealed troubling inaccuracies  
30 and discrepancies among the various methods, calling into question their ability to reliably identify true ecological  
31 interactions. For microbial communities, the only successful validations of these methods have occurred in simple,  
32 well-mixed liquid cultures [7]. Taken in concert, these studies highlight potential pitfalls in our ability to correctly  
33 identify species interactions when communities are sampled over underlying spatial heterogeneity. Most natural  
34 microbial communities are spatially structured and exhibit marked heterogeneity at multiple spatial scales. Failure to  
35 account for this underlying spatial heterogeneity in environmental samples can undermine our conclusions about the  
36 ecological processes structuring microbial assemblages [12].

## 37 **2 Causes and consequences of heterogeneity in microbial samples**

38 Typical sample volumes used for environmental marker gene and metagenomics studies are rarely smaller than 0.1 mL,  
39 but can be as large as 100 L of seawater and 100 g of soil in low-DNA habitats. Unless these samples come from a  
40 well-mixed, completely homogeneous medium, they will contain at least some amount of spatial structure. For example,  
41 a typical 0.25 g sample of soil containing particles 1 mm in diameter (i.e., a very coarse sand) will inevitably contain  
42 hundreds to thousands of discrete granules on which microbial communities can assemble. These discrete habitats  
43 can represent a heterogeneous array of environments or resources, each selecting for their own unique local microbial  
44 communities [13]. However, even a physicochemically homogeneous collection of particles can contain a mosaic of  
45 distinct microbial communities owing to the effects of limited or asymmetric dispersal, priority effects, and successional  
46 turnover.

47 Fine-scale heterogeneity in microbial communities appears to be a general property of environmental samples,  
48 having been repeatedly documented in aquatic, soil, fecal, leaf surface, and wastewater habitats [13, 14, 15, 16, 17, 18].  
49 Owing to this, marker gene samples commonly represent a sum of sequence reads made over underlying environmental  
50 heterogeneity, leaving us with a bulk inventory of OTUs and their (often relative) abundances without their spatial  
51 context. Because microbial interactions such as resource competition, phage predation, DNA transfer, and syntrophy are  
52 hypothesized to take place at spatial scales much smaller than that of the typical bulk sample, it can be argued that many  
53 marker gene samples actually measure the *metacommunity* — a collection of semi-autonomous communities linked  
54 through dispersal [19]. In the following sections, we illustrate how collecting samples at the metacommunity scale can  
55 introduce errors into computational estimates of interspecific interactions by virtue of three phenomena: *Simpson's*  
56 *paradox*, *context-dependence*, and *nonlinear averaging*. Note that although we present total abundance data throughout

57 our scenarios, these phenomena also apply to compositional (i.e., relative abundance) data, which are more commonly  
58 collected in environmental marker gene surveys.

## 59 **2.1 Simpson's paradox**

60 Simpson's paradox refers to the reversal or negation of a statistical association between two variables,  $X$  and  $Y$ , when  
61 conditioned on a third variable,  $Z$  [20]. In ecology, this  $Z$  variable might include information on spatial variation among  
62 local patches, which, if accounted for, changes the direction of a trend at larger spatial scales [21]. Computational  
63 approaches to inferring microbial interactions can be sensitive to the effects of Simpson's paradox. For instance, the  
64 inferred signs of interspecific correlation coefficients might change when comparing analytic results obtained from bulk  
65 community samples with results that have statistically accounted for underlying variation in microhabitats or resource  
66 availability within bulk samples.

67 To illustrate this point, consider a study that uses data obtained from bulk soil samples to infer the sign of  
68 interspecific interaction between two fungal taxa. If the true nature of this interaction is competitive, then our results  
69 are anticipated to reveal a negative correlation between the abundances of the two fungi. To add some realism to this  
70 scenario, let us assume that each of our samples represent collections of discrete microhabitats on which our focal  
71 taxa grow. Finally, we might also make the realistic assumption that both of our fungal taxa respond similarly to these  
72 discrete microhabitats such that sub-optimal habitats support fewer individuals of both species. If we populate bulk  
73 soil samples with random draws of simulated communities on each of three discrete microhabitat types (Fig. 1a), we  
74 find that even slight variation in the frequency distribution of these microhabitats within bulk samples leads to positive  
75 correlations between our two taxa, contradictory to their true, competitive local interactions. Furthermore, by repeating  
76 this experiment many times, each time re-assembling our bulk samples by populating them with equal numbers of  
77 randomly-selected discrete microhabitat particles, we encounter an overwhelming majority of cases where the inferred  
78 sign of interaction between our two taxa (positive) is the opposite of its true sign (negative) (Fig. 1b), leading us to  
79 erroneously conclude that these species are not strong competitors when, in truth, they are. Because of Simpson's  
80 paradox, we contend that unless the assumption of homogeneity within and among microbial community samples is  
81 justified, interspecific interaction coefficients derived from correlation or model-based approaches should be interpreted  
82 with extreme caution, and should always include a statement concerning the spatial context of the sample including  
83 potential sources of underlying spatial heterogeneity.

## 84 **2.2 Context dependence**

85 A common assumption of computational approaches for identifying species interactions is that the sign and strength of  
86 interactions are immutable across time and space. This assumption reduces the sample sizes required for estimating  
87 correlation coefficients or population parameters, and permits the use of graph theoretic descriptors of network structure  
88 (connectance, nestedness, etc.). However, numerous laboratory experiments have documented context-dependent  
89 interactions arising from variation in population densities, community composition, or environmental context, such that  
90 interactions measured at one place and time cannot reliably be extrapolated across habitats [22, 23, 24, 25]. For instance,  
91 a recent study documented predictable shifts in the sign of species interactions with changing resource concentrations

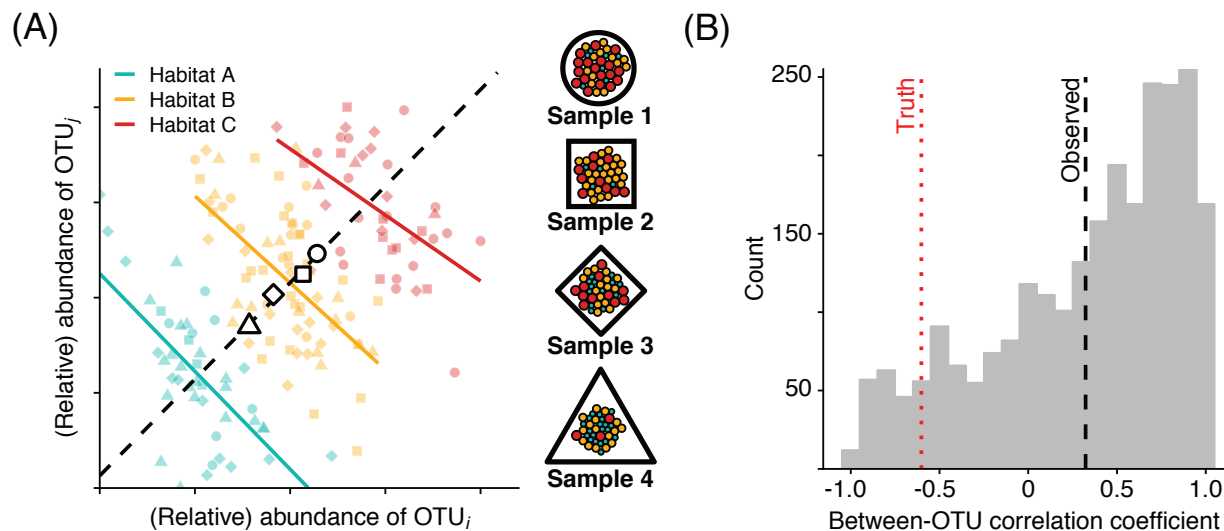

**Figure 1:** (A) Example of how Simpson's paradox can influence the identification of interspecific interactions. Colored points show the abundances of OTUs  $i$  and  $j$  in samples across three discrete microhabitats. Though the OTUs compete with one another in all three habitat types, their population responses to each habitat are correlated. When bulk samples containing any variation in microhabitat composition are sequenced (denoted by white points), the inferred sign of species interactions can be erroneous. (B) A simulation analysis of 2500 individual OTU correlations taken from samples consisting of 250 randomly-assembled individual particles reveals that the average inferred sign of interspecific interactions is positive, whereas the true sign of these interactions (simulated at the scale of individual particles) is negative.

92 in experimental yeast communities as cross-feeding gave way to competition [26] (Fig. 2a). The presence of predators  
93 can also mediate the sign of interspecific interactions through a variety of mechanisms [27] (e.g., Fig. 2b). Likewise,  
94 a meta-analysis of hundreds of experiments uncovered a strong effect of spatial heterogeneity on context-dependent  
95 species interactions [28]. Consequently, it is not unreasonable to expect the signs of microbial interactions to change  
96 across gradients of resource density, predation pressure, or other indicators of habitat quality (Fig. 2c). While temporal  
97 correlation network approaches might be used to circumvent the static interactions assumption at larger spatial scales  
98 or in well-mixed samples, they cannot account for variable interactions arising from underlying spatial heterogeneity  
99 within individual samples.

100 From a theoretical perspective, context-dependence is hypothesized to be a critical factor for maintaining  
101 diversity in spatially-structured communities [29]. For instance, the abilities of two competing microbial strains  
102 to coexist will be enhanced if the negative impacts of competition experienced by each strain are stronger in more  
103 favourable habitat patches [29]. Given that microbial species richness appears to peak in particulate, heterogeneous  
104 habitats (soil, sediments) [1], context-dependent interactions within these habitats may be quite common and important  
105 in promoting high levels of diversity. Currently, the extent of context-dependent interactions in spatially-structured  
106 microbial communities remains largely unknown. We note, though, that correlation network approaches have been  
107 successfully used to identify context-dependent interactions robust to experimental ground-truthing [30]. However,  
108 until the prevalence and magnitude of context-dependent microbial interactions are better understood, we encourage

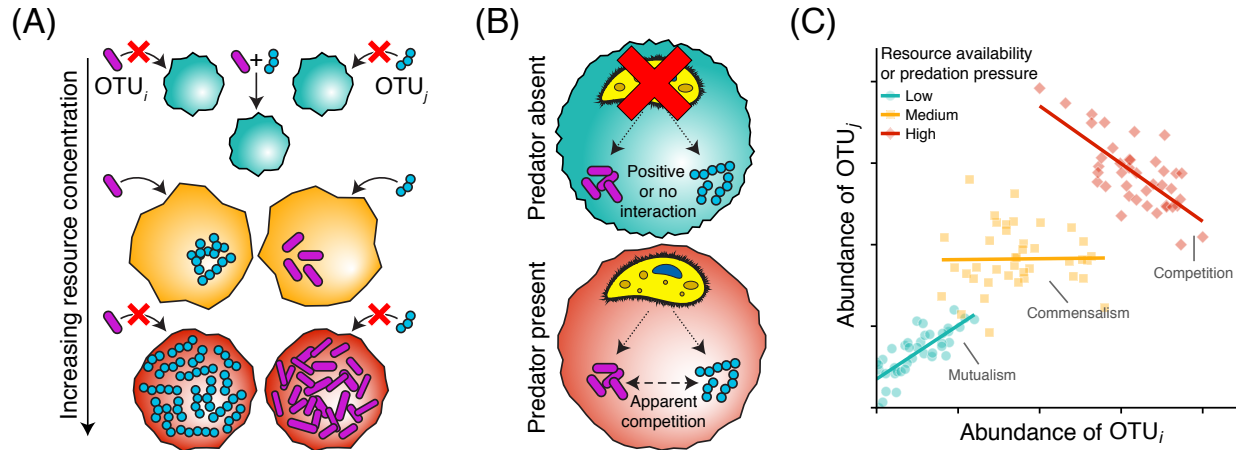

**Figure 2:** Examples of context-dependent species interactions. (A) Resource availability can modulate the sign of interspecific interactions. For instance, local resource limitation can weaken the strength of competition when (i) it selects for cross-feeding or another mutualistic, resource-concentrating behaviour, or (ii) when it limits the strength of interspecific negative density dependence. (B) Likewise, in situations where a shared predator is present, species that do not compete for shared resources can experience apparent competition by supplementing the predator densities. (C) These context-dependent interactions can lead to highly variable estimates of the signs of OTU interactions, depending on the spatial distribution of resources or predators within the sample.

109 researchers to exercise caution when making general statements concerning any local estimates of interspecific  
 110 interactions, ideally contextualizing results to the specific environment and scale at which measurements were taken.

### 111 2.3 Nonlinear averaging

112 The previous two sections concerned issues that arise when quantifying local microbial interactions from heterogeneous  
 113 samples. However, we also face difficulties when using microbial community data collected at very small scales  
 114 to quantify the aggregate behavior of aggregate microbial communities. Imagine that we are now able to obtain  
 115 measurements of microbial populations at the scale of the individual microhabitat patches. Such data could be obtained,  
 116 for instance, using a fluorescence in situ hybridization (FISH) approach to directly count cell densities on soil particles.  
 117 Importantly, these data are collected at the spatial scale over which intraspecific interactions play out, which, in a  
 118 heterogeneous sample experiencing dispersal among particles, is at the scale of individual microhabitat patches or  
 119 particles. Called the *characteristic scale*, it is the scale which maximizes the ratio of deterministic signal to the  
 120 influences of stochasticity and spatial heterogeneity [31], making it the optimal scale for measuring and characterizing  
 121 the effects of deterministic species interactions.

122 Let us now envision a scenario where we wish to quantify whether a microbial OTU's competitive ability is a  
 123 function of the local soil type. Since accurately estimating the strength of competition in our samples is of paramount  
 124 importance, suppose we have conducted our sequencing surveys at appropriately small characteristic scales and have  
 125 generated time series data from this assortment of individual particles. We then fit a population dynamic model to these  
 126 data in order to estimate our OTU's growth rate and competitive interactions among different soil types, adequately  
 127 replicated within each type. The generalized Lotka-Volterra (gLTV) population dynamic model is increasingly being  
 128 utilized for this purpose. Fitting such a differential equation model requires estimating parameters describing a focal

129 species' growth rates and interspecific interactions. The gLV model commonly takes the form

$$\frac{dN_i}{dt} = N_i \left( \mu_i + \sum_{j=1}^M \alpha_{ij} N_j \right), \quad i = 1, \dots, M, \quad (1)$$

130 where  $N_i$  is the abundance of OTU  $i$ ,  $\mu_i$  is its maximum *per capita* growth rate, and  $\alpha_{ij}$  is a parameter describing the  
131 proportional change in its growth rate with conspecific or heterospecific densities. Values of  $\alpha_{ij}$  greater than zero imply  
132 that OTU  $j$  has a positive effect on OTU  $i$ , which might stem from interactions such as syntrophy, whereas values less  
133 than zero can signify interactions such as competition or chemical inhibition.

134 For illustrative purposes, let us simplify our problem of estimating competition among soil types by assuming that  
135 only our single focal OTU occupies our habitats, and so is only capable of experiencing intraspecific competition. This  
136 permits us to simplify our model to the case where ( $i = j$ ), and define  $\alpha_{ij} = -\mu_i K_i^{-1}$ , where  $K_i$  represents the local  
137 carrying capacity of our OTU  $i$ . This results in the familiar logistic population growth model describing decelerating  
138 microbial population growth with increasing population density. Expanding this model across a spatially-structured  
139 array of individual particles, we obtain the equation

$$\frac{dN_x}{dt} = \mu N_x \left( 1 - \frac{N_x}{K} \right), \quad x = 1, \dots, n, \quad (2)$$

140 where  $N_x$  are the local sub-populations of our focal OTU on habitat particle  $x$ .

141 With a collection of population equations for our individual particles, we can now aggregate our local dynamics  
142 to obtain general growth parameters for our soil types. This scaling-up process requires a spatial averaging of local  
143 population dynamics. Crucially, because the average of a nonlinear function is not equal to the function of its averaged  
144 covariates (i.e.,  $\overline{f(N)} \neq f(\overline{N})$ ), to scale up microbial population dynamics — which are almost unanimously nonlinear  
145 — by averaging across spatially-variable local populations will result in biases proportional to the spatial population  
146 variation and model's nonlinearity. This principle, called *Jensen's inequality*, has important consequences for our ability  
147 to accurately estimate scaled-up model parameters and make predictions from any gLV model fit to datasets containing  
148 underlying spatial heterogeneity.

149 The consequences of this spatial averaging process are illustrated in Fig. 3. For notational simplicity, we replace  
150 the growth function in equation 2,  $\mu N_x(1 - N_x/K)$ , with  $G(N_x)$ . The spatially-averaged dynamical equation that  
151 we wish to obtain is  $\frac{d\overline{N}}{dt} = \overline{G(N)}$ . Calculating our population dynamic model using the spatial averages of the  
152 populations we have measured,  $\overline{G(\overline{N})}$ , overestimates the correctly scaled-up population growth function,  $\overline{G(N)}$ . In Fig.  
153 3c, we generated four collections of particles in which spatially-explicit populations have been randomly drawn from  
154 lognormal distributions having equal means but different variances ( $\sigma^2$ ). We then used these simulated data to fit four  
155 spatially-averaged population growth functions,  $\overline{G(\overline{N})}$ . These results demonstrate how increasing the spatial variation  
156 among local populations has the effect of changing our scaled-up estimates of carrying capacity. The challenge for  
157 microbiologists is to accurately estimate  $\overline{G(N)}$  using our measured population densities,  $N_x$ . Fortunately, if we have  
158 already collected these values, and if they can be reasonably fit to a population dynamic model, we can use the tools of  
159 *scale transition theory* [32, 33] to correctly obtain scaled-up population parameters. We briefly introduce these methods  
160 in the following section.



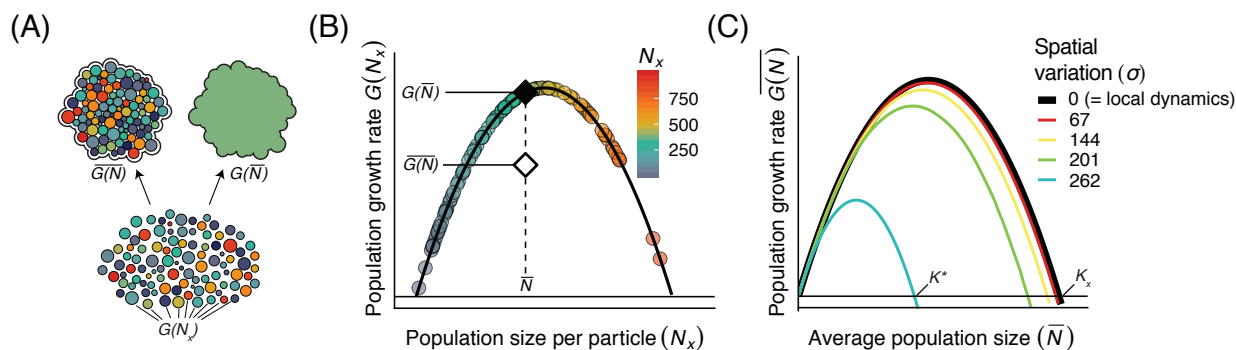

**Figure 3:** (A) Illustration of the concept of scaling-up local microbial community dynamics to quantify the behavior of an aggregate sample. Colors denote an OTU’s population sizes across a heterogeneous collection of particles governed by the shared, nonlinear dynamics,  $G(N_x)$ , shown in equation 2. Note the conceptual differences between aggregating these data by averaging over the local nonlinear dynamics,  $\bar{G}(\bar{N})$ , and by fitting our small-scale dynamical model to the average population density,  $G(\bar{N})$ . (B) The differences in these aggregation procedures result in differing estimates for scaled-up population dynamics. The black curve shows the logistic governing dynamics,  $G(N)$ , of populations on individual particles (colored circles). Note the difference in growth rates between the correctly spatially-averaged growth function (white diamond) and growth function fit to the spatial average population density (black diamond). (C) Increasing the spatial variation of local populations results in vastly different spatially-averaged population dynamics. Here again, the black line denotes the local dynamics,  $G(N)$ , which equals the the spatial average when there is no variation among subpopulations. For this concave-down function, increasing the spatial variation causes the scaled-up carrying capacity,  $K^*$  to be smaller than the local carrying capacity,  $K_x$ .

### 161 3 Recommendations moving forward

162 Despite the various ways in which spatial heterogeneity can subvert our interpretation or complicate our assessment of  
 163 microbial community interactions and dynamics, we are optimistic that these issues can be surmounted with prudent  
 164 data collection, analysis, and interpretation. The lurking effects of habitat heterogeneity are most effectively mitigated  
 165 by quantifying microbial populations or communities at the spatial scales over which cell-cell interactions occur,  
 166 which is on the scale of micrometers to millimeters. Sampling at this scale has successfully been accomplished using  
 167 individual grains of sand [13], aquatic organic particles [34], and sludge granules [35] — all of which encountered  
 168 marked heterogeneity among particles. Sampling at this scale is facilitated by technologies such as fluorescence-  
 169 activated cell sorting and laser-assisted microdissection, which offer the opportunity to precisely and efficiently capture  
 170 individual microscopic particles for sequencing. However, as we have seen, even measurements made at the appropriate  
 171 characteristic scales can be challenging to generalize.

172 The restrictive assumptions of most correlation network and null models hinder our reliable assessment of microbial  
 173 interactions in all but the most homogeneous samples. However, the influence of Simpson’s paradox and context-  
 174 dependence may be surmounted by measuring and statistically accounting for the confounding effects of environmental  
 175 and/or community variation among samples. Empirically, this might include increased efforts to quantify a sample’s  
 176 micro-scale composition using spatially-resolved mass spectrometry and FISH techniques. Though challenging to  
 177 collect, such data could then be used to more test the alternative hypotheses of habitat filtering and competition — both  
 178 of which can feasibly manifest as identical community patterns in the presence of microhabitat variation.

179 While creative new statistical approaches for identifying nonlinear and context-dependent species interactions  
 180 are becoming available [36], we suggest these methods be ground-truthed with more complex and realistic data than  
 181 are currently in use. For example, rather than using time series simulated from equilibrium Lotka-Volterra equations  
 182 to ground truth a new method, a more powerful validation routine could use data simulated from spatially-explicit  
 183 agent-based models, which can test methods' robustness to spatial heterogeneity, scale-dependence, and demographic  
 184 stochasticity. We also encourage the inclusion of dynamic parameters in generalised Lotka-Volterra models. While  
 185 it is challenging to estimate these parameters from observational data, experiments consistently show that microbial  
 186 growth rate, carrying capacity, and interaction parameters are functions of their underlying environments. A benefit  
 187 of including environmentally-dependent growth parameters in gLV models is that these models can then be used to  
 188 quantify the effects of various coexistence-promoting mechanisms [29]. Context-dependent parameters also allow us to  
 189 investigate the effects of environmental change on microbial populations and communities.

190 The increasing use of gLV models in microbial ecology also prompts us to account for the effects of nonlinear  
 191 spatial averaging on scaled up population dynamics (section 2.3). Chesson's scale transition theory [32, 33] provides  
 192 a mathematical framework for tackling the issues of spatial heterogeneity and nonlinearities in gLV models. We  
 193 introduce the scale transition using two simple models, but refer interested readers to the original papers for general  
 194 scale transition approaches [32, 33]. Continuing from section 2.3, we can calculate the scaled-up population dynamics,  
 195  $\overline{G(\overline{N})}$ , by accounting for the nonlinearity in  $G(N_x)$  using its second derivative,  $G''(N_x)$ , as well as the spatial variation  
 196 in  $N_x$ , measured by the spatial variance,  $\text{Var}(N)$ . The full, spatially-averaged population model can be approximated  
 197 as

$$\begin{aligned} \frac{d\overline{N}}{dt} &= \overline{G(\overline{N})} \approx G(\overline{N}) + \frac{1}{2} G''(\overline{N}) \text{Var}(N) \\ &\approx \overline{g(\overline{N})} \overline{N} + \frac{1}{2} g''(\overline{N}) \text{Var}(N) \overline{N} + g'(\overline{N}) \text{Var}(N), \end{aligned} \quad (3)$$

198 where  $\frac{1}{2} G''(\overline{N}) = g'(\overline{N}) = -\mu/K$ . This approximation is exact when the growth function is quadratic (as is the case  
 199 for logistic growth).

200 A similar, albeit more complicated scale transition can be calculated for a multispecies gLV model (eq. 1) [32].  
 201 This model is commonly used to identify interactions, denoted by the  $\alpha_{ij}$  parameters. By defining  $W_i = \sum_{j=1}^M \alpha_{ij} N_j$   
 202 and  $g(W_i) = \mu_i + W_i$ , the scaled up version of equation 1 can be written as a function of mean field terms, a nonlinearity  
 203 term, and spatial variances and covariances:

$$\begin{aligned} \frac{d\overline{N}}{dt} &\approx \overline{g(W_i)} \overline{N}_i + \left[ \frac{1}{2} g''(\overline{W}_i) \text{Var}(W_i) + g'(\overline{W}_i) \text{Cov}(W_i, v_i) \right] \overline{N}_i \\ &\approx \left( \mu_i + \sum_{j=1}^M \alpha_{ij} \overline{N}_j \right) \overline{N}_i - \sum_{j=1}^M \alpha_{ij} \text{Cov}(N_i, N_j), \end{aligned} \quad (4)$$

204 where  $v_i = N_{i,x}/\overline{N}_i$ . Once again, we see that the spatially-averaged population dynamics are not simply a function of  
 205 average populations across space. However, the only extra information needed to calculate the scale transition are the  
 206 spatial variances and covariances of the populations, which we can approximate by measuring local population densities  
 207 across a sufficient number of particles within a sample. Thus, the calculation of scale transition terms is straightforward  
 208 once they are defined for a particular dynamic model.



209        Given the potential for biases and errors stemming from the joint effects of underlying spatiotemporal heterogeneity  
210 and other methodological choices (e.g., relative abundance transformations, normalization techniques) [37], it may  
211 seem like the inference of species interactions from observational microbial data represents an *underdetermination*  
212 problem. That is, there may be multiple, or even infinite potential mechanisms capable of generating an observed  
213 community pattern. However, this problem, like many in ecology and evolution, can more precisely be described as  
214 an example of *contrast failure* [38]. Instead of a solution-free, underdetermined system, we instead have one where  
215 our failure to parse competing hypotheses is a transient consequence of data insufficiency. Access to better, more  
216 *contrastive* data, derived either experimentally or observationally at the appropriate spatiotemporal scales, will refine  
217 our ability to discriminate among alternative hypotheses. In the meantime, we do not advocate for the abandonment  
218 of 'pattern-to-process' approaches for deciphering microbial interactions. On the contrary, we are optimistic about  
219 continued methodological development in this area. In the meantime, we implore researchers to consider and confront  
220 the lurking effects of spatial structure on their inferred microbial interaction networks and growth parameters. At  
221 minimum, this could simply comprise a comment on the spatiotemporal scale over which the results are anticipated to  
222 hold and a description of the spatial structure contained within a sample unit.

## 223 **References**

- 224 [1] Thompson LR, Sanders JG, McDonald D, Amir A, Ladau J, Locey KJ, et al. A communal catalogue reveals  
225 Earth's multiscale microbial diversity. *Nature*. 2017;551:457–463.
- 226 [2] Prosser JI, Bohannan BJM, Curtis TP, Ellis RJ, Firestone MK, Freckleton RP, et al. The role of ecological theory  
227 in microbial ecology. *Nature Reviews Microbiology*. 2007;5:384–392.
- 228 [3] Nemergut DR, Schmidt SK, Fukami T, O'Neill SP, Bilinski TM, Stanish LF, et al. Patterns and processes of  
229 microbial community assembly. *Microbiol Mol Biol Rev*. 2013;77:342–356.
- 230 [4] Faust K, Raes J. Microbial interactions: from networks to models. *Nature Reviews Microbiology*. 2012;10:538–  
231 550.
- 232 [5] Bálint M, Bahram M, Eren AM, Faust K, Fuhrman JA, Lindahl B, et al. Millions of reads, thousands of taxa:  
233 microbial community structure and associations analyzed via marker genes. *FEMS Microbiology Reviews*.  
234 2016;40:686–700.
- 235 [6] Layeghifard M, Hwang DM, Guttman DS. Disentangling interactions in the microbiome: A network perspective.  
236 *Trends in Microbiology*. 2017;25:217–228.
- 237 [7] Xiao Y, Angulo MT, Friedman J, Waldor MK, Weiss ST, Liu YY. Mapping the ecological networks of microbial  
238 communities. *Nature Communications*. 2017;8:2042.
- 239 [8] Roughgarden J. Competition and theory in community ecology. *The American Naturalist*. 1983;122:583–601.
- 240 [9] Sander EL, Wootton JT, Allesina S. Ecological network inference from long-term presence-absence data. *Scientific*  
241 *Reports*. 2017;7:7154.
- 242 [10] Barner AK, Coblentz KE, Hacker SD, Menge BA. Fundamental contradictions among observational and  
243 experimental estimates of non-trophic species interactions. *Ecology*. 2018;99:557–566.

- 244 [11] Freilich MA, Wieters E, Broitman BR, Marquet PA, Navarrete SA. Species co-occurrence networks: Can they  
245 reveal trophic and non-trophic interactions in ecological communities? *Ecology*. 2018;99:690–699.
- 246 [12] Berry D, Widder S. Deciphering microbial interactions and detecting keystone species with co-occurrence  
247 networks. *Frontiers in Microbiology*. 2014;5.
- 248 [13] Probandt D, Eickhorst T, Ellrott A, Amann R, Knittel K. Microbial life on a sand grain: from bulk sediment to  
249 single grains. *The ISME Journal*. 2018;12:623–633.
- 250 [14] Hunt DE, David LA, Gevers D, Preheim SP, Alm EJ, Polz MF. Resource Partitioning and Sympatric Differentiation  
251 Among Closely Related Bacterioplankton. *Science*. 2008;320:1081–1085.
- 252 [15] Sessitsch A, Weilharter A, Gerzabek MH, Kirchmann H, Kandeler E. Microbial Population Structures in Soil  
253 Particle Size Fractions of a Long-Term Fertilizer Field Experiment. *Appl Environ Microbiol*. 2001;67:4215–4224.
- 254 [16] Swidsinski A, Loening–Baucke V, Verstraelen H, Osowska S, Doerffel Y. Biostructure of fecal microbiota in  
255 healthy subjects and patients with chronic idiopathic diarrhea. *Gastroenterology*. 2008;135:568–579.e2.
- 256 [17] Remus-Emsermann MNP, Tecon R, Kowalchuk GA, Leveau JHJ. Variation in local carrying capacity and the  
257 individual fate of bacterial colonizers in the phyllosphere. *The ISME Journal*. 2012;6:756–765.
- 258 [18] Gonzalez-Gil G, Holliger C. Aerobic granules: microbial landscape and architecture, stages, and practical  
259 implications. *Applied and Environmental Microbiology*. 2014;80:3433–3441.
- 260 [19] Leibold MA, Holyoak M, Mouquet N, Amarasekare P, Chase JM, Hoopes MF, et al. The metacommunity concept:  
261 a framework for multi-scale community ecology. *Ecology Letters*. 2004;7:601–613.
- 262 [20] Blyth CR. On Simpson’s paradox and the sure-thing principle. *Journal of the American Statistical Association*.  
263 1972;67:364–366.
- 264 [21] Scheiner SM, Cox SB, Willig MR, Mittelbach GG, Osenberg CW, Kaspari M. Species richness, species–area  
265 curves and Simpson’s paradox. *Evolutionary Ecology Research*. 2000;2:791–802.
- 266 [22] Muinck EJd, Stenseth NC, Sachse D, Roost Jv, Rønningen KS, Rudi K, et al. Context-Dependent Competition in  
267 a Model Gut Bacterial Community. *PLOS ONE*. 2013;8:e67210.
- 268 [23] Liu A, Archer AM, Biggs MB, Papin JA. Growth-altering microbial interactions are responsive to chemical  
269 context. *PLOS ONE*. 2017;12:e0164919.
- 270 [24] Tecon R, Ebrahimi A, Kleyer H, Levi SE, Or D. Cell-to-cell bacterial interactions promoted by drier conditions  
271 on soil surfaces. *Proceedings of the National Academy of Sciences*. 2018;115:9791–9796.
- 272 [25] Gould AL, Zhang V, Lamberti L, Jones EW, Obadia B, Gavryushkin A, et al. High-dimensional microbiome  
273 interactions shape host fitness. *bioRxiv*. 2018;:232959.
- 274 [26] Hoek TA, Axelrod K, Biancalani T, Yurtsev EA, Liu J, Gore J. Resource availability modulates the cooperative  
275 and competitive nature of a microbial cross-feeding mutualism. *PLOS Biology*. 2016;14:e1002540.
- 276 [27] Chesson P, Kuang JJ. The interaction between predation and competition. *Nature*. 2008;456:235–238.
- 277 [28] Chamberlain SA, Bronstein JL, Rudgers JA. How context dependent are species interactions? *Ecology Letters*.  
278 2014;17:881–890.

- 279 [29] Chesson P. General theory of competitive coexistence in spatially-varying environments. *Theoretical Population*  
280 *Biology*. 2000;58:211–237.
- 281 [30] Agler MT, Ruhe J, Kroll S, Morhenn C, Kim ST, Weigel D, et al. Microbial hub taxa link host and abiotic factors  
282 to plant microbiome variation. *PLOS Biology*. 2016;14:e1002352.
- 283 [31] Pascual M, Levin SA. From Individuals to Population Densities: Searching for the Intermediate Scale of Nontrivial  
284 Determinism. *Ecology*. 1999;80:2225–2236.
- 285 [32] Chesson P, Donahue MJ, Melbourne BA, Sears ALW. Scale transition theory for understanding mechanisms  
286 in metacommunities. In: Holyoak M, Leibold MA, Holt RD, editors. *Metacommunities: spatial dynamics and*  
287 *ecological communities*. Chicago: University Of Chicago Press; 2005. 279–306.
- 288 [33] Chesson P. Scale transition theory: Its aims, motivations and predictions. *Ecological Complexity*. 2012;10:52–68.
- 289 [34] Bižić-Ionescu M, Ionescu D, Grossart HP. Organic Particles: Heterogeneous Hubs for Microbial Interactions in  
290 Aquatic Ecosystems. *Frontiers in Microbiology*. 2018;9.
- 291 [35] Kuroda K, Nobu MK, Mei R, Narihiro T, Bocher BTW, Yamaguchi T, et al. A Single-Granule-Level Approach Re-  
292 veals Ecological Heterogeneity in an Upflow Anaerobic Sludge Blanket Reactor. *PLOS ONE*. 2016;11:e0167788.
- 293 [36] Harris DJ. Inferring species interactions from co-occurrence data with Markov networks. *Ecology*. 2016;97:3308–  
294 3314.
- 295 [37] Weiss S, Treuren WV, Lozupone C, Faust K, Friedman J, Deng Y, et al. Correlation detection strategies in  
296 microbial data sets vary widely in sensitivity and precision. *The ISME Journal*. 2016;10:1669–1681.
- 297 [38] Forber P. Spandrels and a pervasive problem of evidence. *Biology & Philosophy*. 2008;24:247.
